# Supplementary material
Source: Springer Nature journal article supplement (https://www.springermedizin.de/resource/supplementary/12875_2012_809_MOESM3_ESM.pdf/9435122)
Supplement: MOESM3 [file 9435122]

Step 1: HKU evaluation team drafted generic quality of care indicator framework

Step 3: HKU evaluation team refined programme specific indicators, criteria & standards

Step 5: Programme WG and HKU evaluation team reconciliation on indicators, criteria, standards and operational definitions

Step 2: Programme WG defined indicators and criteria

Step 4: Programme WG specified detailed setting of indicators, criteria & standards

Step 6: Programme WG reviewed and finalized the framework that is evidence-based and practical
